# Supplementary material for: Evaluation of Mobile Risk Perception Training System for Improving the Safety Awareness of Construction Workers
Source: MDPI journal article supplement (doi:10.3390/buildings13123024), 2023-12-05
Supplement: s1 [file s1]

**Supplementary Materials for**

**Evaluation of Mobile Risk Perception Training System  
for Improving the Safety Awareness of Construction  
Workers**

Minji Kim <sup>1</sup>, Dongmyung Jo <sup>2</sup> and Jaewook Jeong <sup>1,\*</sup>

9 pages;

1 figure;

3 tables.

### **Figure Captions**

Figure S1 shows conventional TBM improvement requests.

### **Table Captions**

Table S1 shows results of  $t$ -test about the positive perception and satisfaction of daily safety activities.

Table S2 shows results of  $t$ -test about TBM training effect and safety awareness of workers.

Table S3 shows full text of the survey.

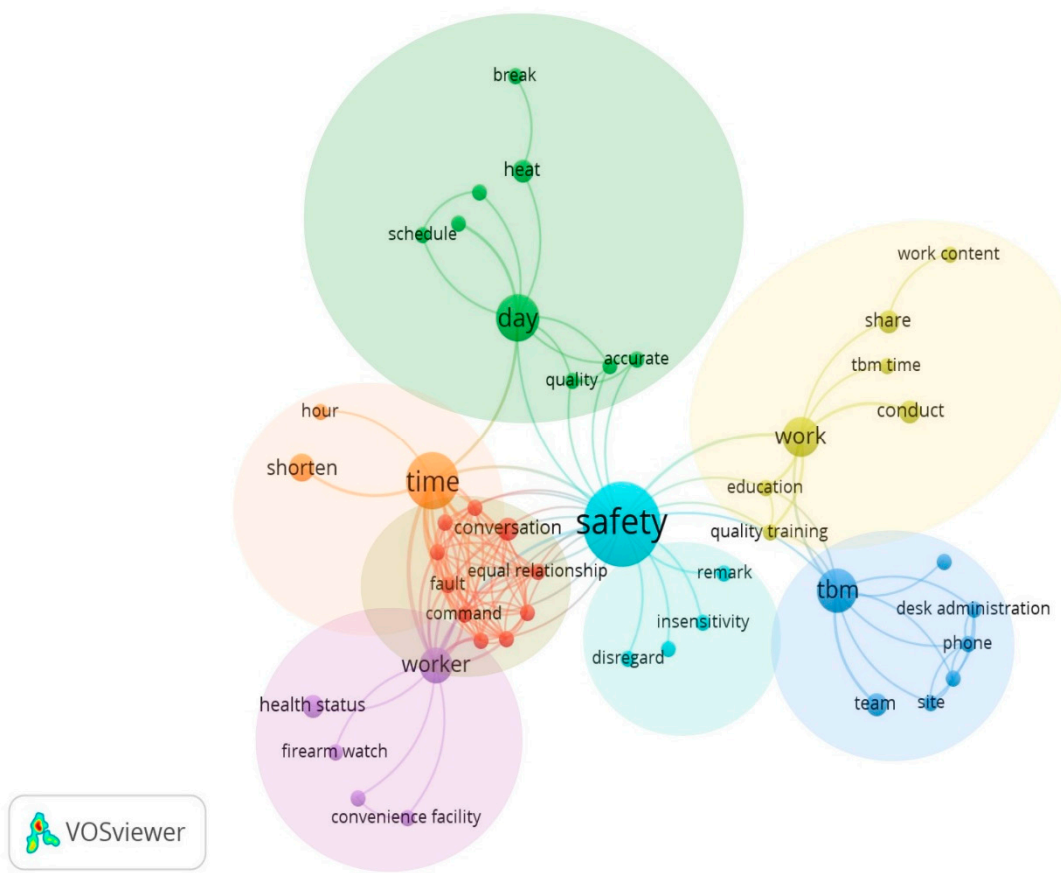

**Figure S1.** Graph showing the results of VOSViewer on conventional TBM improvement requests.

**Table S1.** Results of *t*-test about the positive perception and satisfaction of daily safety activities.

| Dependent variable                           | Group            | Numbers | Average | Steve. D | <i>t</i> -test | p-value |
|----------------------------------------------|------------------|---------|---------|----------|----------------|---------|
| Education of Risk Assessment                 | Mobile TBM       | 400     | 4.29    | 0.73     | 5.39           | 0.000   |
|                                              | Conventional TBM | 400     | 3.97    | 0.90     |                |         |
| Positive perception of Risk Assessment       | Mobile TBM       | 400     | 4.19    | 0.93     | 4.67           | 0.000   |
|                                              | Conventional TBM | 400     | 3.87    | 1.01     |                |         |
| Education of Permit to safety work           | Mobile TBM       | 400     | 4.26    | 0.74     | 5.23           | 0.000   |
|                                              | Conventional TBM | 400     | 3.96    | 0.87     |                |         |
| Positive perception of Permit to safety work | Mobile TBM       | 400     | 4.19    | 0.80     | 4.88           | 0.000   |
|                                              | Conventional TBM | 400     | 3.89    | 0.93     |                |         |
| Sharing of Safety Meeting                    | Mobile TBM       | 400     | 4.20    | 0.81     | 4.13           | 0.000   |
|                                              | Conventional TBM | 400     | 3.95    | 0.89     |                |         |
| Positive perception of Safety Meeting        | Mobile TBM       | 400     | 4.14    | 0.85     | 3.73           | 0.000   |
|                                              | Conventional TBM | 400     | 3.91    | 0.92     |                |         |
| Satisfaction of TBM conduct                  | Mobile TBM       | 400     | 4.35    | 0.69     | 5.65           | 0.000   |
|                                              | Conventional TBM | 400     | 4.03    | 0.86     |                |         |
| Education of Safety Rules Training           | Mobile TBM       | 400     | 4.36    | 0.68     | 5.52           | 0.000   |
|                                              | Conventional TBM | 400     | 4.06    | 0.83     |                |         |
| Education of Safety Inspect                  | Mobile TBM       | 400     | 4.28    | 0.75     | 3.76           | 0.000   |
|                                              | Conventional TBM | 400     | 3.95    | 0.84     |                |         |
| Positive perception of Safety Check          | Mobile TBM       | 400     | 4.13    | 0.89     | 5.96           | 0.000   |
|                                              | Conventional TBM | 400     | 3.89    | 0.88     |                |         |

**Table S2.** Results of *t*-test about TBM training effect and safety awareness of workers.

| Dependent variable           | Group            | Numbers | Average | Steve. D | <i>t</i> -test | p-value |
|------------------------------|------------------|---------|---------|----------|----------------|---------|
| Memorizing Safety Rules      | Mobile TBM       | 400     | 4.09    | 1.05     | 1.87           | 0.061   |
|                              | Conventional TBM | 400     | 3.95    | 0.98     |                |         |
| Memorizing Accident cases    | Mobile TBM       | 400     | 3.83    | 1.19     | 2.29           | 0.022   |
|                              | Conventional TBM | 400     | 3.63    | 1.21     |                |         |
| Memorizing safety notice     | Mobile TBM       | 400     | 3.93    | 0.65     | 2.02           | 0.044   |
|                              | Conventional TBM | 400     | 3.83    | 0.78     |                |         |
| Conduct of Safety Inspection | Mobile TBM       | 400     | 4.54    | 0.66     | 6.11           | 0.000   |
|                              | Conventional TBM | 400     | 4.21    | 0.84     |                |         |
| Accident Prevention Effect   | Mobile TBM       | 400     | 4.33    | 0.78     | 4.52           | 0.000   |
|                              | Conventional TBM | 400     | 4.08    | 0.81     |                |         |

**Table S3.** Full text of the survey.

| Construction Site TBM Progress Questionnaire                                           |                                                                                                                          |
|----------------------------------------------------------------------------------------|--------------------------------------------------------------------------------------------------------------------------|
| 1. What type of TBM are you conducting/participating in?                               | ① Mobile TBM application ② Conventional TBM application                                                                  |
| 2. What is your occupation?                                                            | ① Partner manager ② Team leader ③ Workers                                                                                |
| 3. What's your performance?                                                            | ① Electric/mechanic ② Facility/plumber                                                                                   |
| 4. Who is conducting TBM activities?                                                   | ① Original Contractor Construction Manager<br>② Supplier Construction Manager ③ Safety manager<br>④ Team leader ⑤ Worker |
| 5. How many people are doing TBM activities?                                           | ① No more than 5 people ② 5 to 10 people ③ 10 to 15 people<br>④ 15 to 20 people ⑤ More than 20 people                    |
| 6. During TBM, are you speaking the safety rules you need to follow?                   | ① Not at all ② Speak if asked ③ Speak when necessary<br>④ Occasionally ⑤ Every time                                      |
| 7. How long does the TBM take?                                                         | ① Less than 1-minute ② 1~3 minutes ③ 5~10 minutes<br>④ 10~15 minutes ⑤ More than 15 minutes                              |
| 8. How much would you watch if you provided safety information you're your smartphone? | ① Not look at all ② Hardly look at all ③ Sometimes<br>④ Often ⑤ Frequently                                               |
| 9. How well is the training for risk assessment in TBM?                                | ① Be not doing ② Be on the same ③ Be the normality<br>④ be going well ⑤ be going very well                               |
| 10. How much does risk                                                                 | ① Be of no help ② Be of little help ③ Be the normality<br>④ be of help ⑤ be very helpful                                 |

|                                                                                                      |                                                                                            |
|------------------------------------------------------------------------------------------------------|--------------------------------------------------------------------------------------------|
| assessment help you comply with your own safety regulations?                                         |                                                                                            |
| 11. How well is the training for dangerous work permits in TBM?                                      | ① Be not doing ② Be on the same ③ Be the normality<br>④ be going well ⑤ be going very well |
| 12. How much does the hazardous work permit system help you comply with your safety rules?           | ① Be of no help ② Be of little help ③ Be the normality<br>④ be of help ⑤ be very helpful   |
| 13. How well is the content of TBM city managers' safety meetings shared?                            | ① Be not doing ② Be on the same ③ Be the normality<br>④ be going well ⑤ be going very well |
| 14. How much does a manager's safety meeting help you comply with your safety rules?                 | ① Be of no help ② Be of little help ③ Be the normality<br>④ be of help ⑤ be very helpful   |
| 15. How much does TBM activity help you comply with your safety rules?                               | ① Be of no help ② Be of little help ③ Be the normality<br>④ be of help ⑤ be very helpful   |
| 16. How well is the training on safety rules to be followed in TBM?                                  | ① Be not doing ② Be on the same ③ Be the normality<br>④ be going well ⑤ be going very well |
| 17. How well is training conducted on the results of safety inspection (work monitoring) during TBM? | ① Be not doing ② Be on the same ③ Be the normality<br>④ be going well ⑤ be going very well |
| 18. How much does the safety inspection (work monitoring) activity help                              | ① Be of no help ② Be of little help ③ Be the normality<br>④ be of help ⑤ be very helpful   |

|                                                                                                     |                                                                                                                                                       |
|-----------------------------------------------------------------------------------------------------|-------------------------------------------------------------------------------------------------------------------------------------------------------|
| you comply with your safety rules?                                                                  |                                                                                                                                                       |
| 19. Do you remember some safety rules (CCLs) that you should follow when using TBM?                 | ① Not more than one ② Two things ③ Three things<br>④ Four things ⑤ More than five things                                                              |
| 20. How many accidents do you remember that were transmitted during TBM in the last 3 months?       | ① Not more than one ② Two things ③ Three things<br>④ Four things ⑤ More than five things                                                              |
| 21. How much do you remember about the TBM safety notice?                                           | ① I don't remember at all ② I think there was an announcement<br>③ Have a rough recollection of ④ remember almost everything<br>⑤ remember everything |
| 22. Do you conduct a safety inspection on the safety rules trained during TBM?                      | ① I don't remember at all ② I think there was an announcement<br>③ Have a rough recollection of ④ remember almost everything<br>⑤ remember everything |
| 23. How much effect do you think the safety inspection after TBM will have on preventing accidents? | ① Not at all ② There isn't much ③ Be the normality<br>④ Be high ⑤ Be very high                                                                        |
| 24. TBM Improvements<br>(key word)                                                                  |                                                                                                                                                       |



Table S1 is the result of the *t*-test on the positive perception and satisfaction of daily safety activities. The groups were divided into two groups, and if the p-value was or was less than 0.001, the numbers in each group were divided into 400, confirming that there was a difference in the mean between the two groups.

Table S2 is the result of the *t*-test on the TBM training effect and safety awareness of workers. The groups were divided into two groups, and if the p-value was or was less than 0.1, the numbers in each group were divided into 400, confirming that there was a difference in the mean between the two groups.
